# Supplementary material for: Premature aging and reduced cancer incidence associated with near-complete body-wide Myc inactivation
Source: PubMed Central journal article supplement — Cell Rep. Author manuscript; Available in PMC 2023 Oct 23. (PMC10591215; doi:10.1016/j.celrep.2023.112830), 2023-07-22
Supplement: NIHMS1928229-supplement-1.pdf [file NIHMS1928229-supplement-1.pdf]

**Supplemental information**

**Premature aging and reduced cancer incidence  
associated with near-complete  
body-wide *Myc* inactivation**

**Huabo Wang, Jie Lu, Taylor Stevens, Alexander Roberts, Jordan Mandel, Raghunandan Avula, Bingwei Ma, Yijen Wu, Jinglin Wang, Clinton Van't Land, Toren Finkel, Jerry E. Vockley, Merlin Airik, Rannar Airik, Radhika Muzumdar, Zhenwei Gong, Michel S. Torbenson, and Edward V. Prochownik**

Fig. S1

A

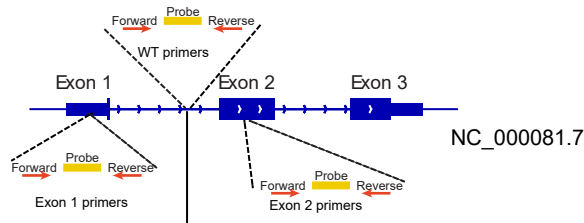

B

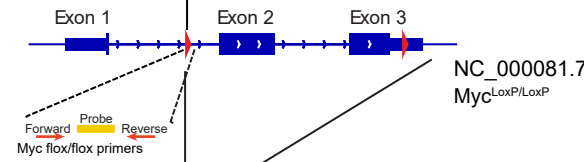

C

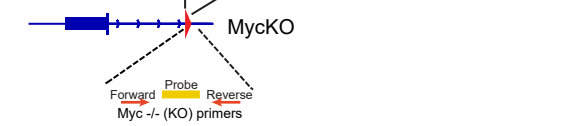

E

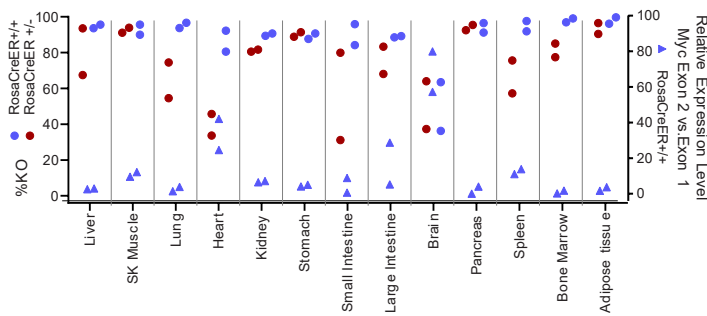

D

|                                           |         | Start (bp) | End (bp)  | Sequence (5' -3')                               |
|-------------------------------------------|---------|------------|-----------|-------------------------------------------------|
| WT<br>(NC_000081.7)                       | Forward | 61858492   | 61858513  | GGGAATCCTCACATTCTACTT                           |
|                                           | Reverse | 61858643   | 61858626  | GATTCAGCACTGGGTGCA                              |
|                                           | Probe   | 61858549   | 61858572  | /56-FAM/TAGGAAGACTGCGGTGAGTCGTGA/3IABkFQ/       |
| Myc <sup>loxP/loxP</sup><br>(NC_000081.7) | Forward | 61858570   | 61858588  | TGATCTGAGCGGTCCGTA                              |
|                                           | Reverse | 61858697   | 61858675  | CACCTCCCTTCTACACTCTAAAC                         |
|                                           | Probe   | Loxp       | Loxp      | /56-FAM/CCTGCACGA/ZEN/TCCGGAACCCCTTAAT/3IABkFQ/ |
| Myc <sup>-/-</sup> (KO)<br>(NC_000081.7)  | Forward | 61858570   | 61858588  | TGATCTGAGCGGTCCGTA                              |
|                                           | Reverse | 61858697   | 61858675  | TAAAGTCCCAAAGACTCCAG                            |
|                                           | Probe   | Loxp       | Loxp      | /56-FAM/CCTGCACGA/ZEN/TCCGGAACCCCTTAAT/3IABkFQ/ |
| Exon 1<br>(NC_000081.7)                   | Forward | 61857404   | 61857425  | GCTGTAGTAATCCAGCGAGAG                           |
|                                           | Reverse | 61857507   | 61857488  | ACTCCAGAGTGCCCTCTTA                             |
|                                           | Probe   | 61857447   | 61857468  | /56-FAM/TTGGAAGAG/ZEN/CCGTGTGTCCAGA/3IABkFQ/    |
| Exon 2<br>(NC_000081.7)                   | Forward | 61859421   | 61859442  | CTCCGTACAGCCCTATTTTCATC                         |
|                                           | Reverse | 61859542   | 61859524  | TGGGAAGCAGCTCGAATTT                             |
|                                           | Probe   | 61859464   | 61859480  | /56-FAM/TATCACCAG/ZEN/CAACAGCA                  |
| Cre<br>(OM228709.1)                       | Forward | 3366       | 3344      | GCGGTCTGGCAGTAAAACTATC                          |
|                                           | Reverse | 3265       | 3287      | GTGAAACAGCATTGCTGTCACTT                         |
|                                           | Probe   | 3323       | 3300      | /56-FAM/AAACATGCT/ZEN/TCATCGTCCGG/3IABkFQ/      |
| Rosa WT<br>(NC_000072.7)                  | Forward | 113053072  | 113053056 | CTGGCTTCTGAGGACCG                               |
|                                           | Reverse | 113052875  | 113052894 | CCGAAAATCTGTGGGAAGTC                            |
|                                           | Probe   | 113052960  | 113052983 | /56-FAM/TTTAAGCT/ZEN/GCCCAAGACTCCC/3IABkFQ/     |

F

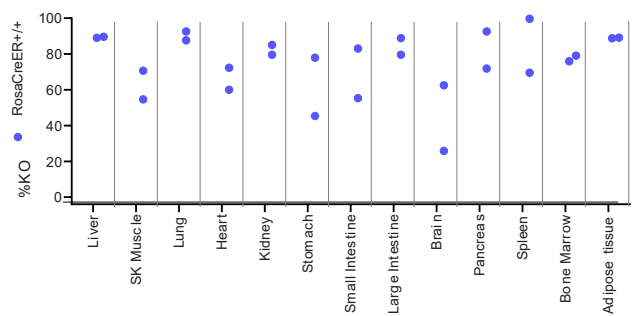

G

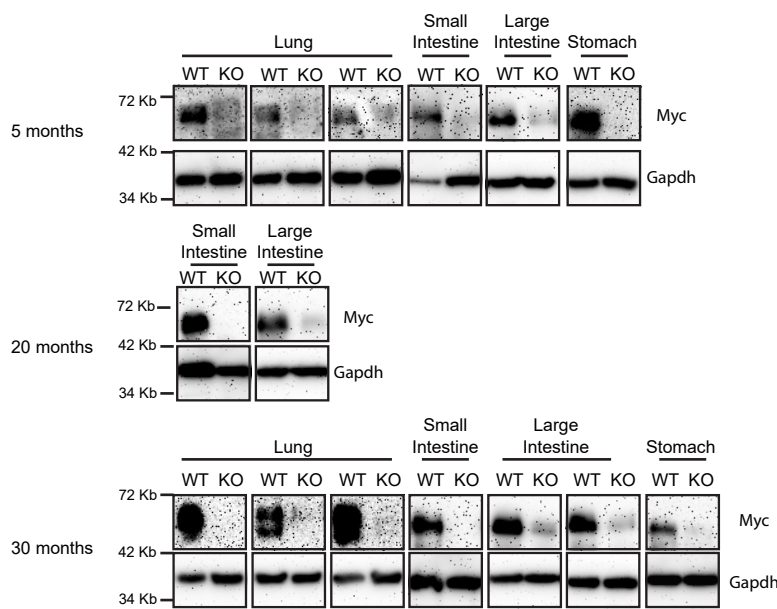

H

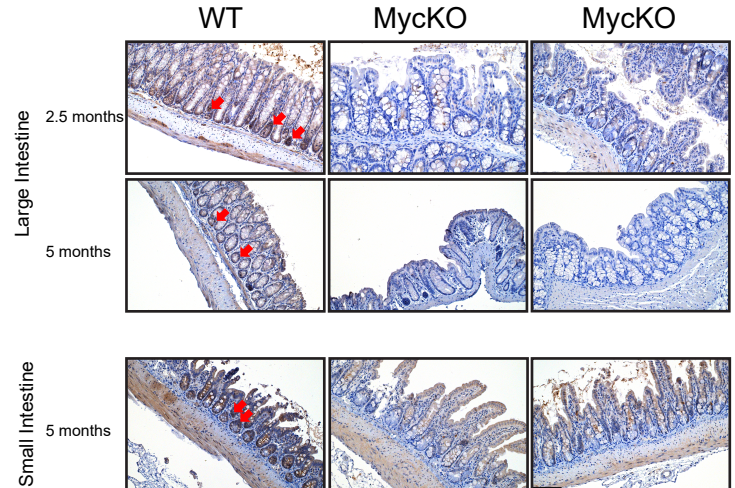



**Figure S1. Strategy for qPCR-based Taq-Man-based assay for identifying *Myc* alleles, related to STAR Methods.**

(A, B). The *Myc* loci of WT and *myc<sup>loxP/loxP</sup>* (B6.129S6-*Myc<sup>tm2Fwa</sup>*/Mmjax) mice. LoxP sites are indicated by red triangles. In A, the red arrows indicate the primer sets used to amplify the WT allele. The reverse primer in intron 1 overlaps the inserted LoxP site in the (*Myc<sup>loxP/loxP</sup>*) allele shown in B. Amplification with this primer set is thus possible only in WT mice and generates a PCR fragment detected with the unique TaqMan probe. In B, red arrows indicate the primer set flanking the 5' LoxP site that specifically amplifies this region and is detected with TaqMan probe.

(C). The excised and recombined *Myc* locus following CreER activation.

(D). Sequences and genomic locations for primers and probes shown in A-C as well as the qRT-PCR primers and probes used for qRT-PCR. Annotations for primers and probes are based on the numbering of the murine genomic sequence: <https://www.ncbi.nlm.nih.gov/gene/17869>.

(E). qPCR and qRT-PCR-based quantification of *Myc* locus excision and expression in ~6-7 wk old mice that had been treated for 5 days with tamoxifen at the time of weaning (~4 wks and weights >15 g). 2 mice with 2 copies of CreER and 2 with a single copy of CreER were used to determine how *Myc* locus excision efficiency was influenced by CreER copy number. After confirming the number of CreER alleles using the TaqMan-based approach described above, the WT:KO *Myc* allele ratio was determined from a standard curve of known amounts of each DNA (Wang et al., 2018; Wang et al., 2022b)(Wang et al., 2018; Wang et al., 2022b). qRT PCR reactions for *Myc* transcripts (<https://www.ncbi.nlm.nih.gov/gene/17869>) were performed on RNAs extracted from tissues of mice with two copies of ROSA-CreER as previously described

<sup>1,2</sup>

(F). Persistence of *Myc* locus deletion. qPCR performed as described in E on the indicated

tissues from 20-22 month-old *Myc*KO mice. See Table S1 for a summary of qPCR and qRT-PCR results performed on various tissues of additional mice.

(G). Immuno-blotting for *Myc* protein in the indicated tissues from 5-6 months, 20-22 months and 30-33 months old WT and *Myc*KO mice.

(H). Immunohistochemical staining for *Myc* protein in the small and large intestines of WT and *Myc*KO mice. Note, in both tissues, the absence of detectable *Myc* in the crypts which is where the highest levels of expression are confined. <sup>3</sup> Scale bar = 100  $\mu$ m.

Fig. S2

A

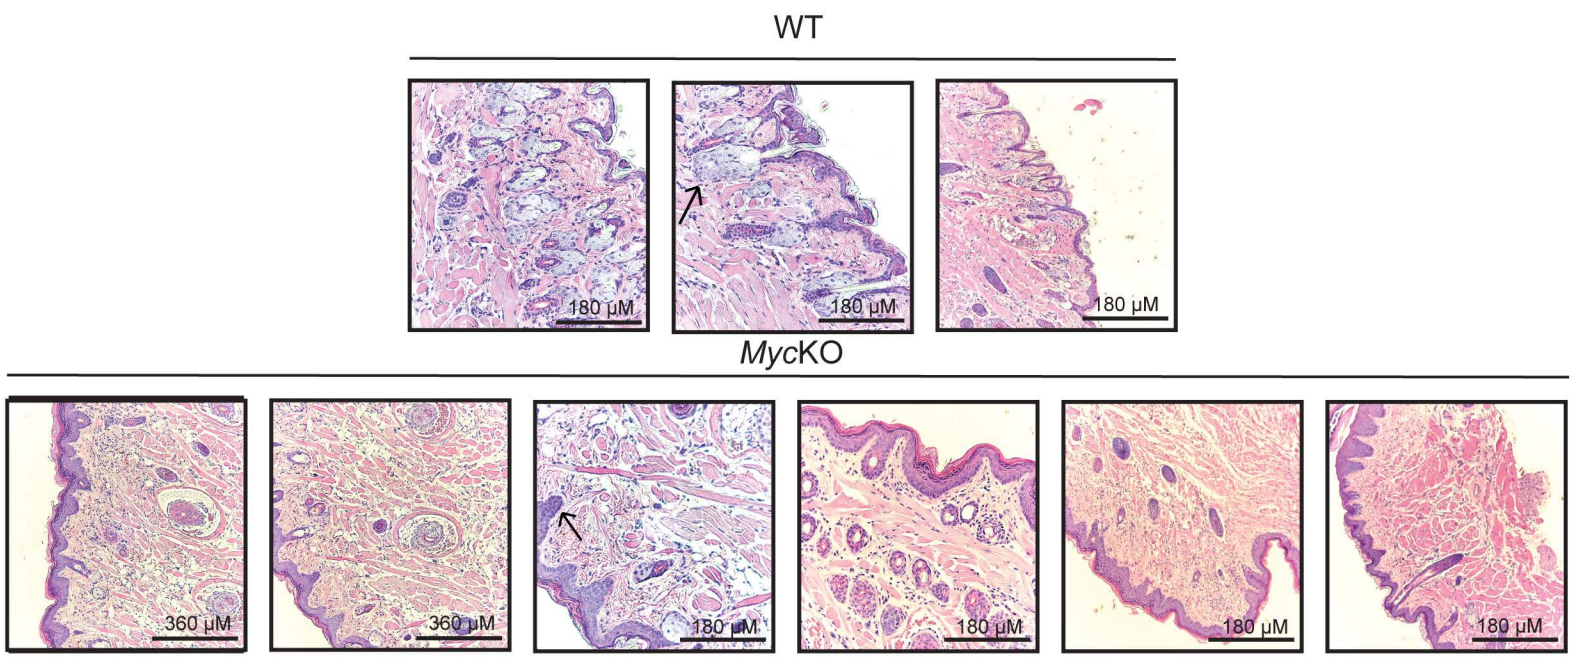

B

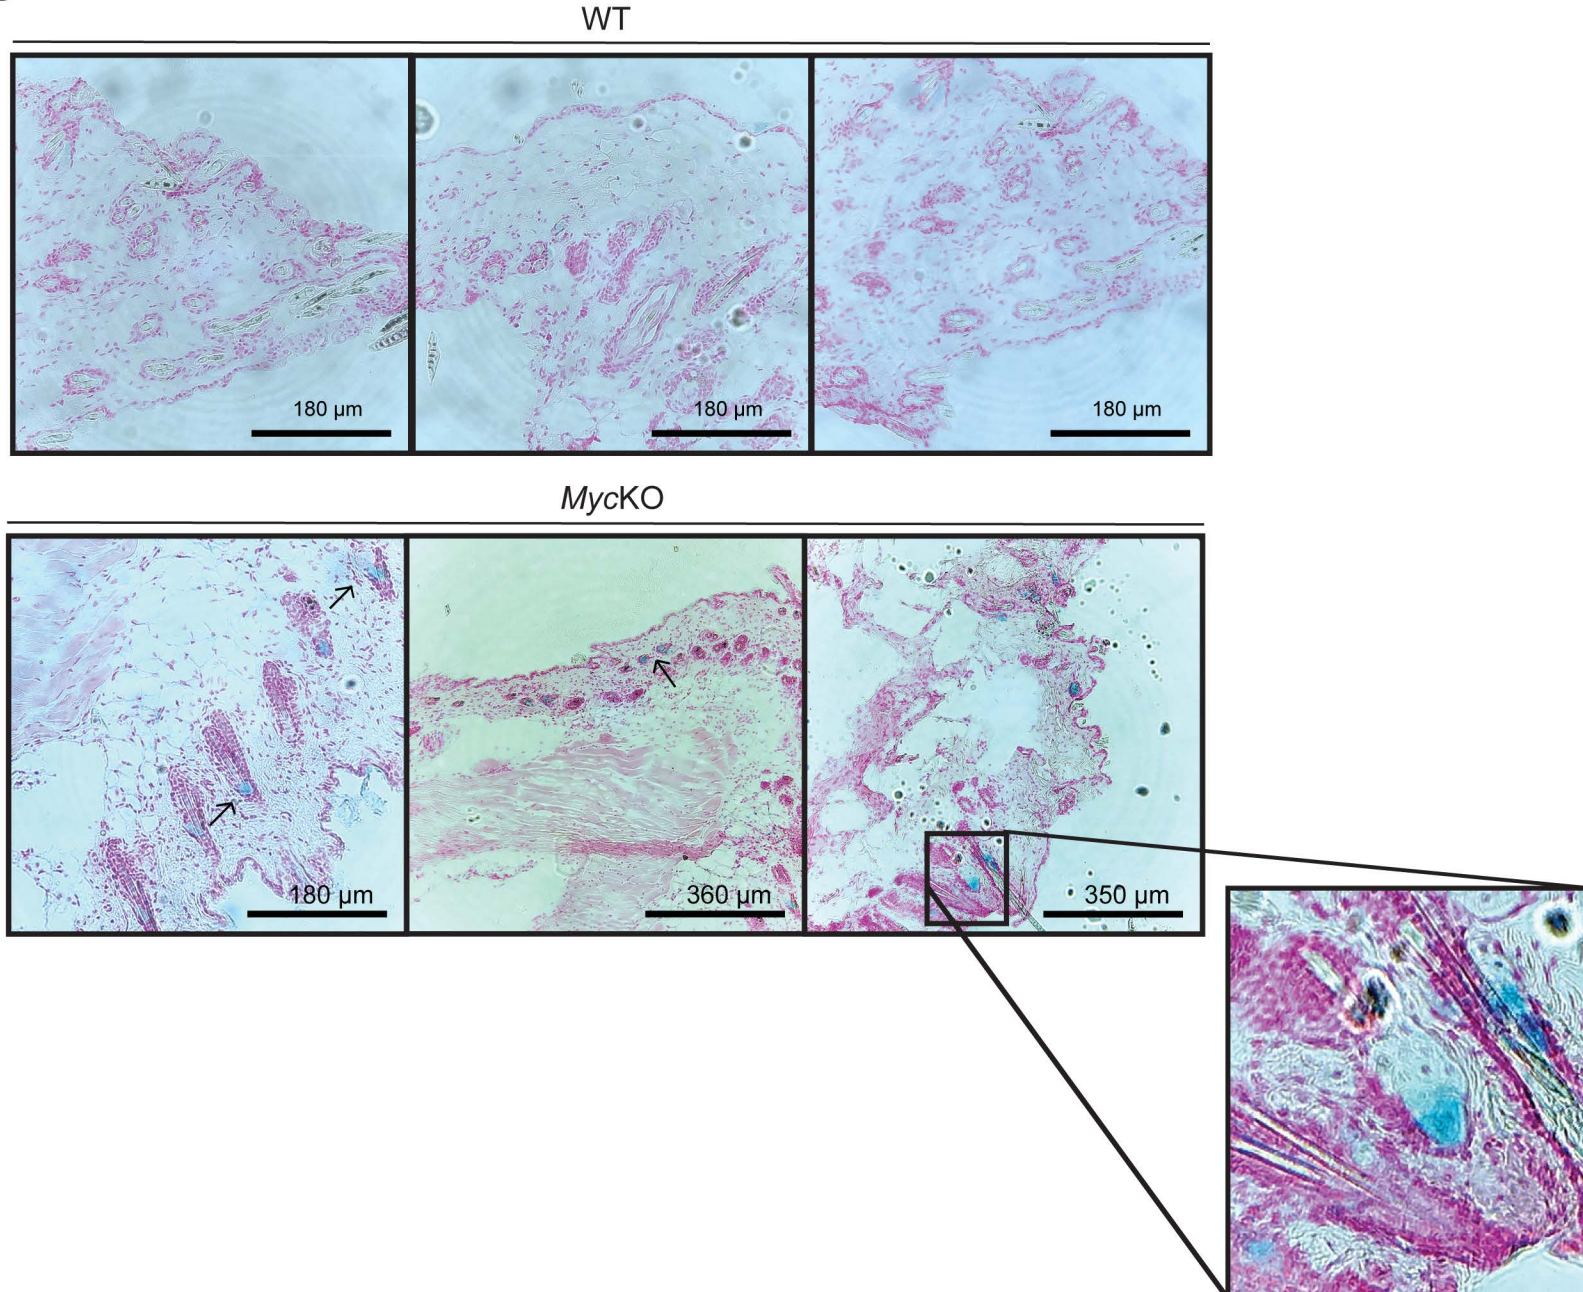

*MyckKO*

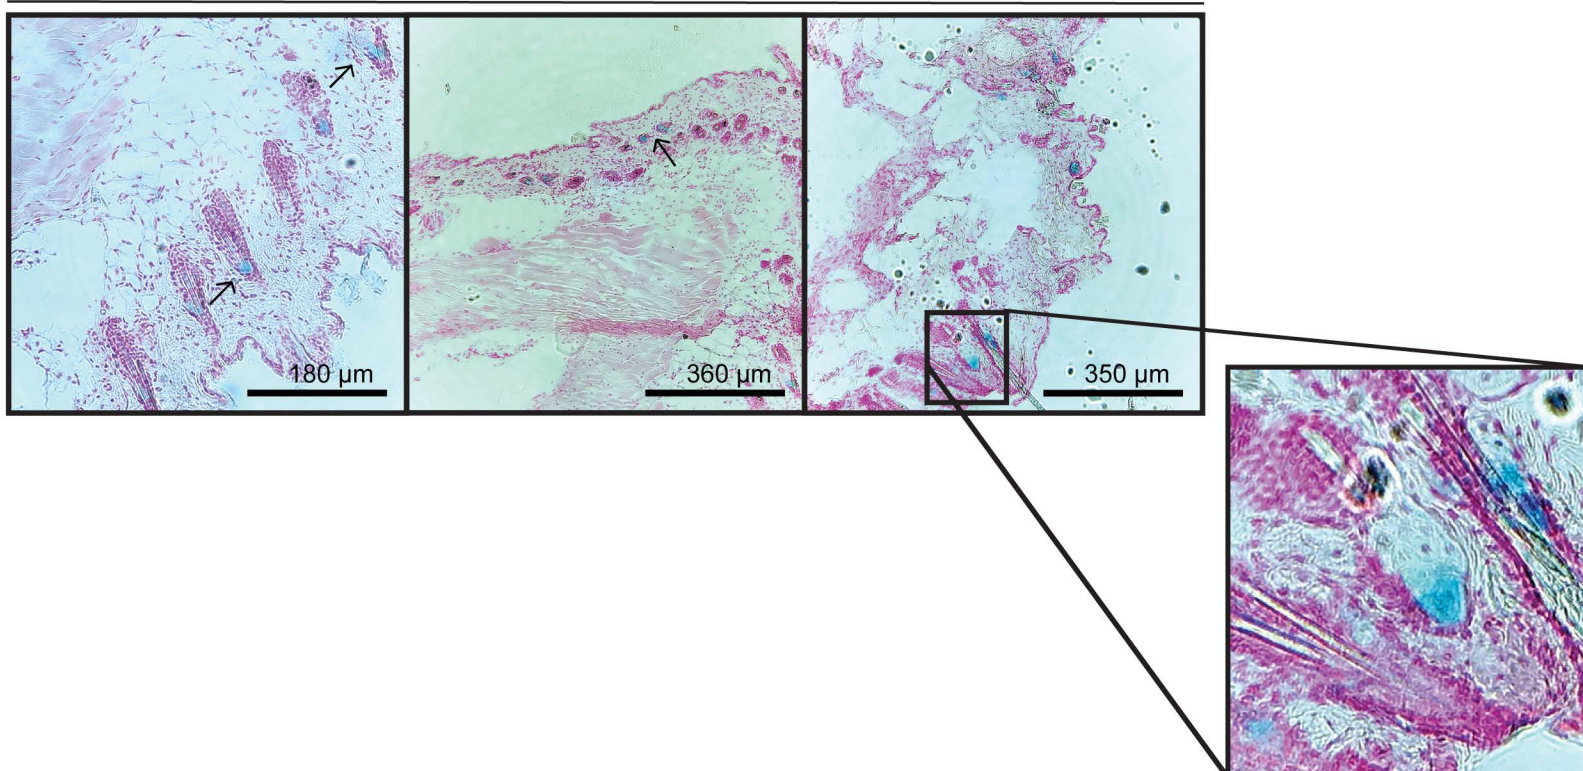

**Figure S2. Histopathology of skin from alopecic regions of *MyckKO* mice and premature onset of senescence, related to Figure 1B&C.**

(A). H&E-stained sections of peri-orbital skin from a 5 mo *MyckKO* mouse and normal skin from the corresponding region of a WT control mouse. In WT panels, the arrow shows normal hair follicles and their adjacent sebaceous glands. In *MyckKO* panels, the arrows show thickening and hyperkeratinization of the epidermis, loss of surface invaginations and a generalized paucity of hair follicles and sebaceous glands. (B). SA- $\beta$ -gal staining of the same areas from the WT and *MyckKO* mice shown in A. Arrows indicate SA- $\beta$ -gal-positive cells in the latter samples adjacent to rare hair follicles. Most of SA- $\beta$ -gal-positive cells detected resided within the inner and outer root sheath and base of the follicle (<http://eulep.pdn.cam.ac.uk/~skinbase/>). A higher power magnification of one of the fields containing SA- $\beta$ -gal-positive cells is shown to the right.



Fig. S3

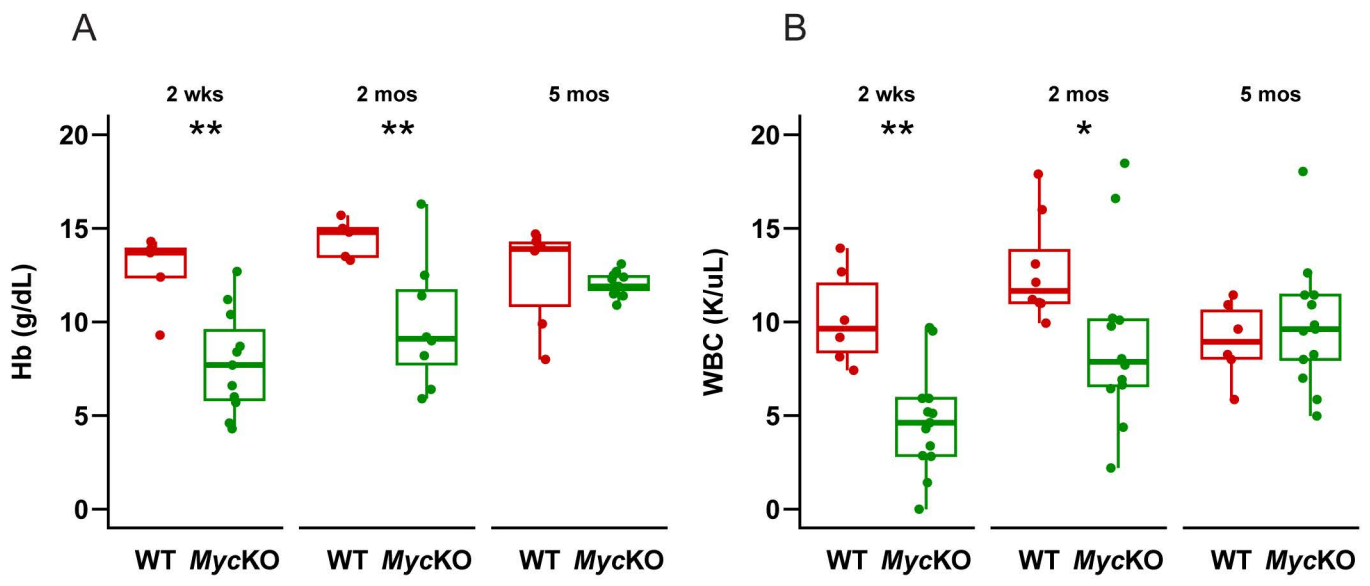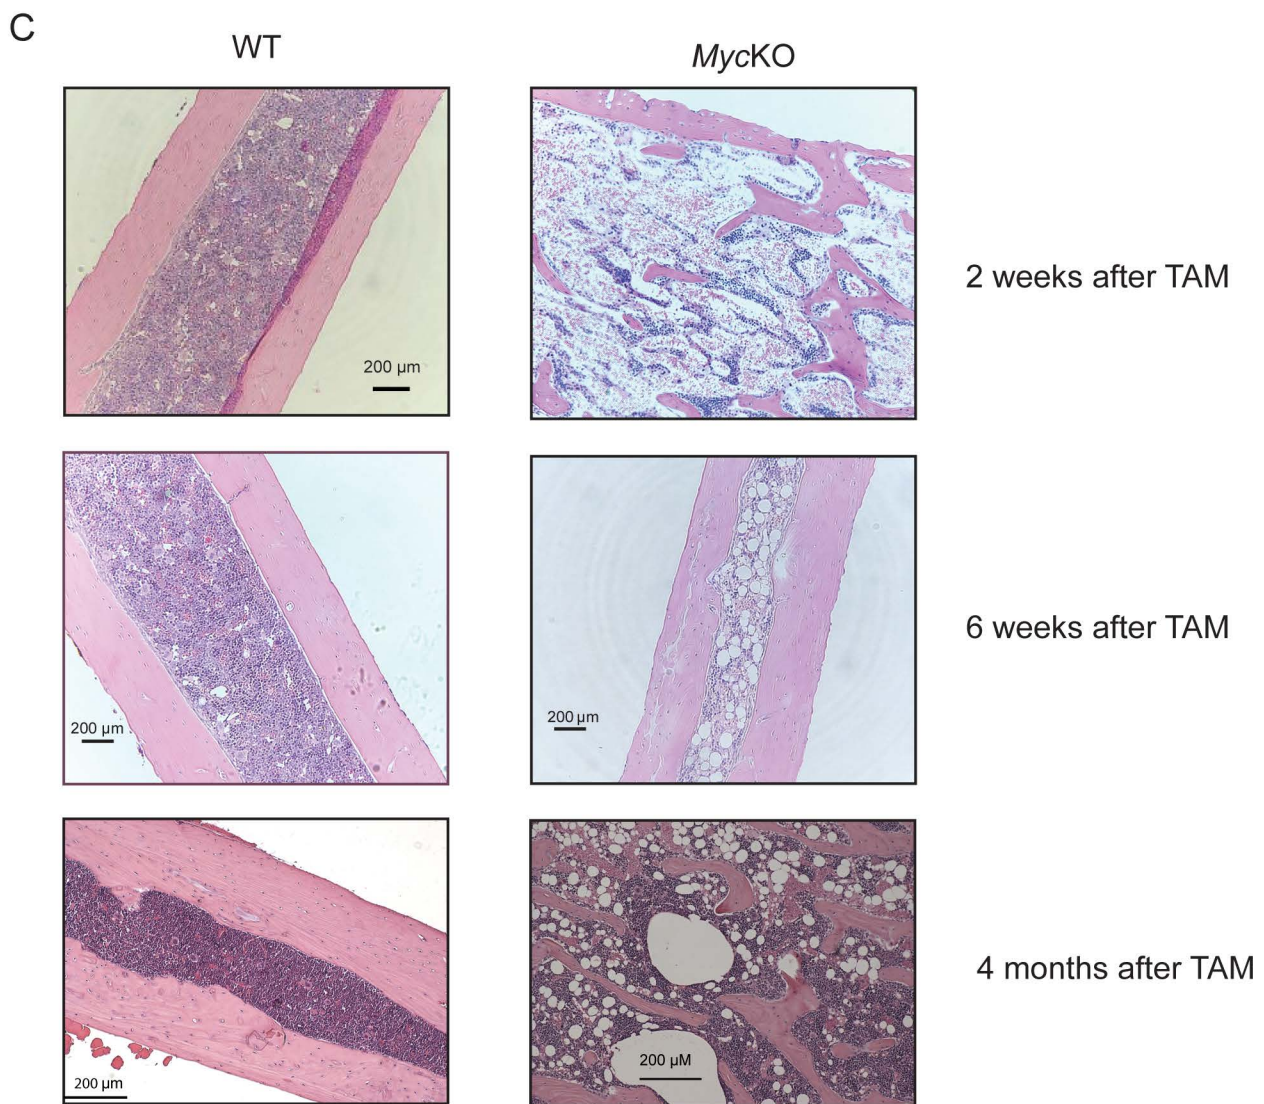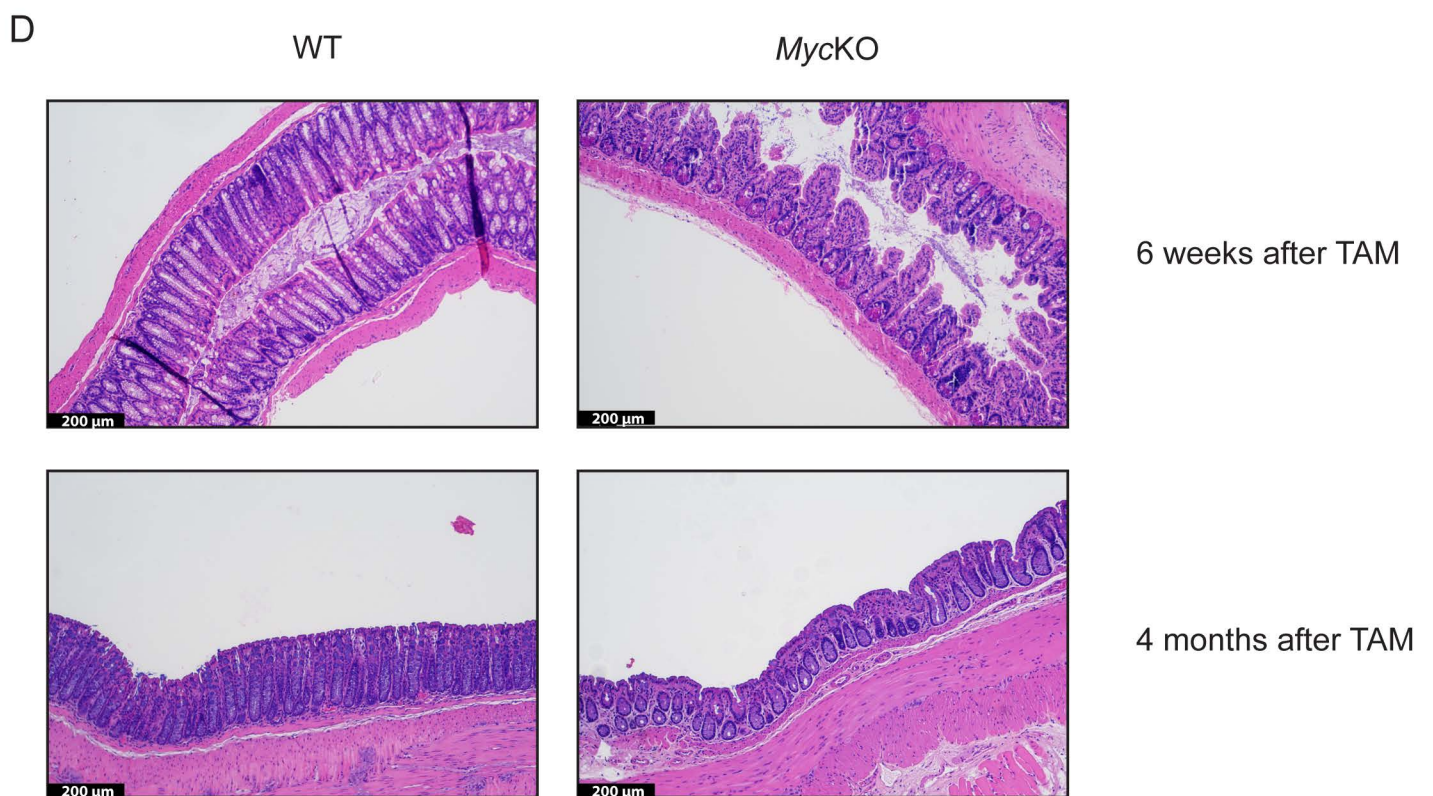

**Figure S3. *Myck*KO mice develop transient mild-moderate, anemia, leukopenia and bone marrow hypoplasia, related to Figure 1&3.**

(A). Hemoglobin levels in WT and age-matched *Myck*KO mice at the indicated ages, which are expressed relative to the time of starting 4-hydroxytamoxifen therapy. N = 6-14 at each age, Unpaired t test, \*= $p < 0.05$ , \*\*= $p < 0.01$ .

(B). Peripheral white blood cell counts performed at the times shown in A.

(C). H&E-stained bone marrows of WT and *Myck*KO mice of the indicated ages.

(D). H&E-stained colonic tissues from WT and *Myck*KO mice of the indicated ages.

Scale bar = 200  $\mu$ m

Fig. S4

A

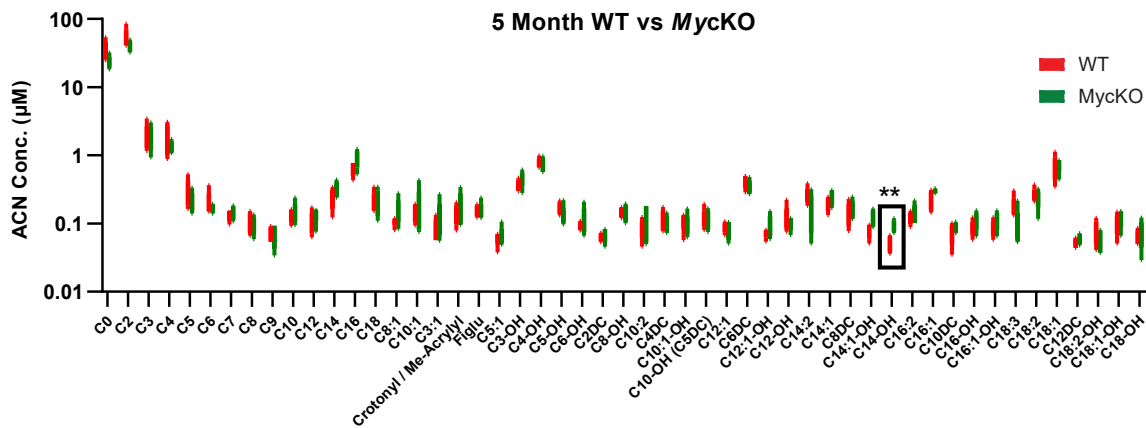

|       | Below threshold? | P value  |                       | Below threshold? | P value  |          | Below threshold? | P value  |          |
|-------|------------------|----------|-----------------------|------------------|----------|----------|------------------|----------|----------|
| C0    | No               | 0.082805 | Crotonyl / Me-Acrylyl | No               | 0.341981 | C14:2    | No               | 0.110939 |          |
| C2    | No               | 0.107371 | Figlu                 | No               | 0.931718 | C14:1    | No               | 0.174621 |          |
| C3    | No               | 0.891553 | C5:1                  | No               | 0.726059 | C8DC     | No               | 0.640394 |          |
| C4    | No               | 0.310665 | C3-OH                 | No               | 0.206181 | C14:1-OH | No               | 0.052795 |          |
| C5    | No               | 0.243173 | C4-OH                 | No               | 0.735646 | C14-OH   | Yes              | **       | 0.003299 |
| C6    | No               | 0.395319 | C5-OH                 | No               | 0.158956 | C16:2    | No               | 0.426658 |          |
| C7    | No               | 0.342432 | C6-OH                 | No               | 0.359565 | C16:1    | No               | 0.066959 |          |
| C8    | No               | 0.408316 | C2DC                  | No               | 0.437708 | C10DC    | No               | 0.267349 |          |
| C9    | No               | 0.932381 | C8-OH                 | No               | 0.815773 | C16-OH   | No               | 0.179856 |          |
| C10   | No               | 0.639306 | C10:2                 | No               | 0.357354 | C16:1-OH | No               | 0.179856 |          |
| C12   | No               | 0.252238 | C4DC                  | No               | 0.519504 | C18:3    | No               | 0.093283 |          |
| C14   | No               | 0.123141 | C10:1-OH              | No               | 0.495535 | C18:2    | No               | 0.605520 |          |
| C16   | No               | 0.112089 | C10-OH (C5DC)         | No               | 0.804210 | C18:1    | No               | 0.788717 |          |
| C18   | No               | 0.812097 | C12:1                 | No               | 0.551986 | C12DC    | No               | 0.268356 |          |
| C8:1  | No               | 0.179578 | C6DC                  | No               | 0.184811 | C18:2-OH | No               | 0.243451 |          |
| C10:1 | No               | 0.757984 | C12:1-OH              | No               | 0.258790 | C18:1-OH | No               | 0.368712 |          |
| C3:1  | No               | 0.365815 | C12-OH                | No               | 0.468176 | C18-OH   | No               | 0.548166 |          |

B

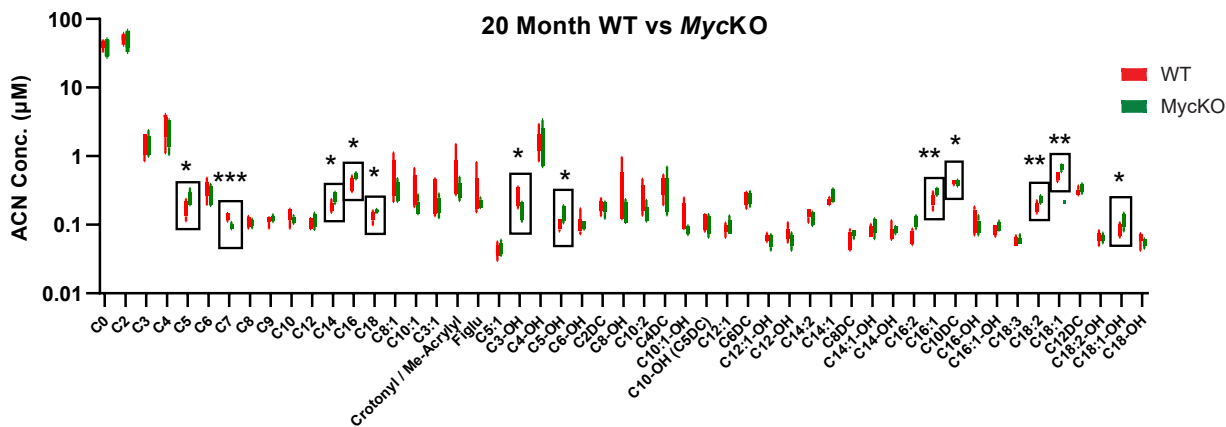

|       | Below threshold? | P value  |                       | Below threshold? | P value  |          | Below threshold? | P value  |          |          |
|-------|------------------|----------|-----------------------|------------------|----------|----------|------------------|----------|----------|----------|
| C0    | No               | 0.301834 | Crotonyl / Me-Acrylyl | No               | 0.264035 | C14:2    | No               | 0.197887 |          |          |
| C2    | No               | 0.611193 | Figlu                 | No               | 0.333312 | C14:1    | No               | 0.073848 |          |          |
| C3    | No               | 0.856345 | C5:1                  | No               | 0.498076 | C8DC     | No               | 0.096298 |          |          |
| C4    | No               | 0.485919 | C3-OH                 | Yes              | *        | 0.016120 | C14:1-OH         | No       | 0.177224 |          |
| C5    | Yes              | *        | 0.035634              | C4-OH            | No       | 0.768323 | C14-OH           | No       | 0.335738 |          |
| C6    | No               | 0.260523 | C5-OH                 | Yes              | *        | 0.012020 | C16:2            | Yes      | **       | 0.003900 |
| C7    | Yes              | ***      | 0.000783              | C6-OH            | No       | 0.996976 | C16:1            | Yes      | *        | 0.014118 |
| C8    | No               | 0.497159 | C2DC                  | No               | 0.720109 | C10DC    | No               | 0.686387 |          |          |
| C9    | No               | 0.496558 | C8-OH                 | No               | 0.294558 | C16-OH   | No               | 0.293995 |          |          |
| C10   | No               | 0.222842 | C10:2                 | No               | 0.137534 | C16:1-OH | No               | 0.150042 |          |          |
| C12   | No               | 0.359745 | C4DC                  | No               | 0.413080 | C18:3    | No               | 0.969488 |          |          |
| C14   | Yes              | *        | 0.013240              | C10:1-OH         | No       | 0.125231 | C18:2            | Yes      | **       | 0.008329 |
| C16   | Yes              | *        | 0.044914              | C10-OH (C5DC)    | No       | 0.590178 | C18:1            | Yes      | **       | 0.003805 |
| C18   | Yes              | *        | 0.037790              | C12:1            | No       | 0.708297 | C12DC            | No       | 0.117119 |          |
| C8:1  | No               | 0.319791 | C6DC                  | No               | 0.770883 | C18:2-OH | No               | 0.595252 |          |          |
| C10:1 | No               | 0.124682 | C12:1-OH              | No               | 0.590031 | C18:1-OH | Yes              | *        | 0.043729 |          |
| C3:1  | No               | 0.442019 | C12-OH                | No               | 0.130382 | C18-OH   | No               | 0.225025 |          |          |

**Figure S4. Young and old *MyckO* mice show evidence of Complex I defects and more generalized mitochondrial dysfunction, related to Figure 4F&G**

(A). 5 month-old mice. The results from Figure 4F are again shown along with the actual values obtained for each serum acyl carnitine. Unpaired t test, \*\*= $p < 0.01$

(B). 20 month-old mice. The results from Figure 4G are again shown along with the actual values obtained for each serum acyl carnitine. Unpaired t test, \*= $p < 0.05$ , \*\*= $p < 0.01$ , \*\*\*= $p < 0.001$ .



Fig. S5

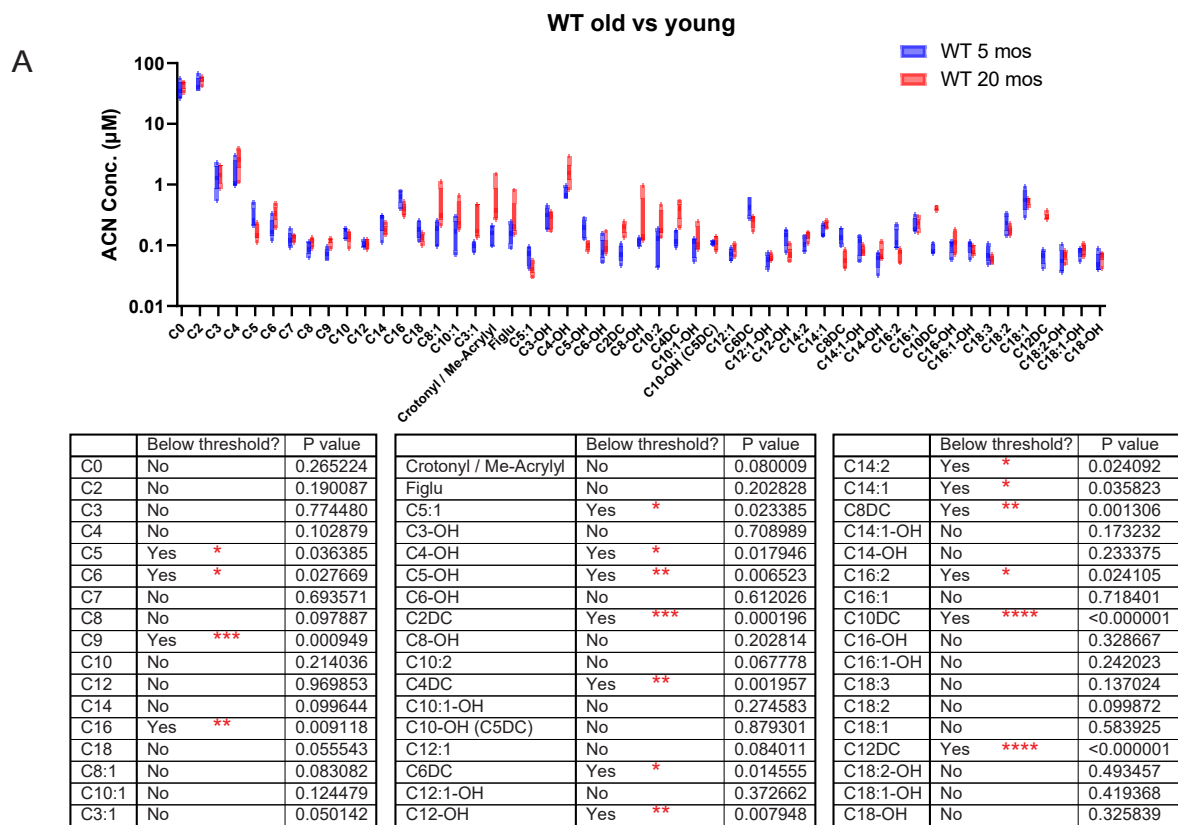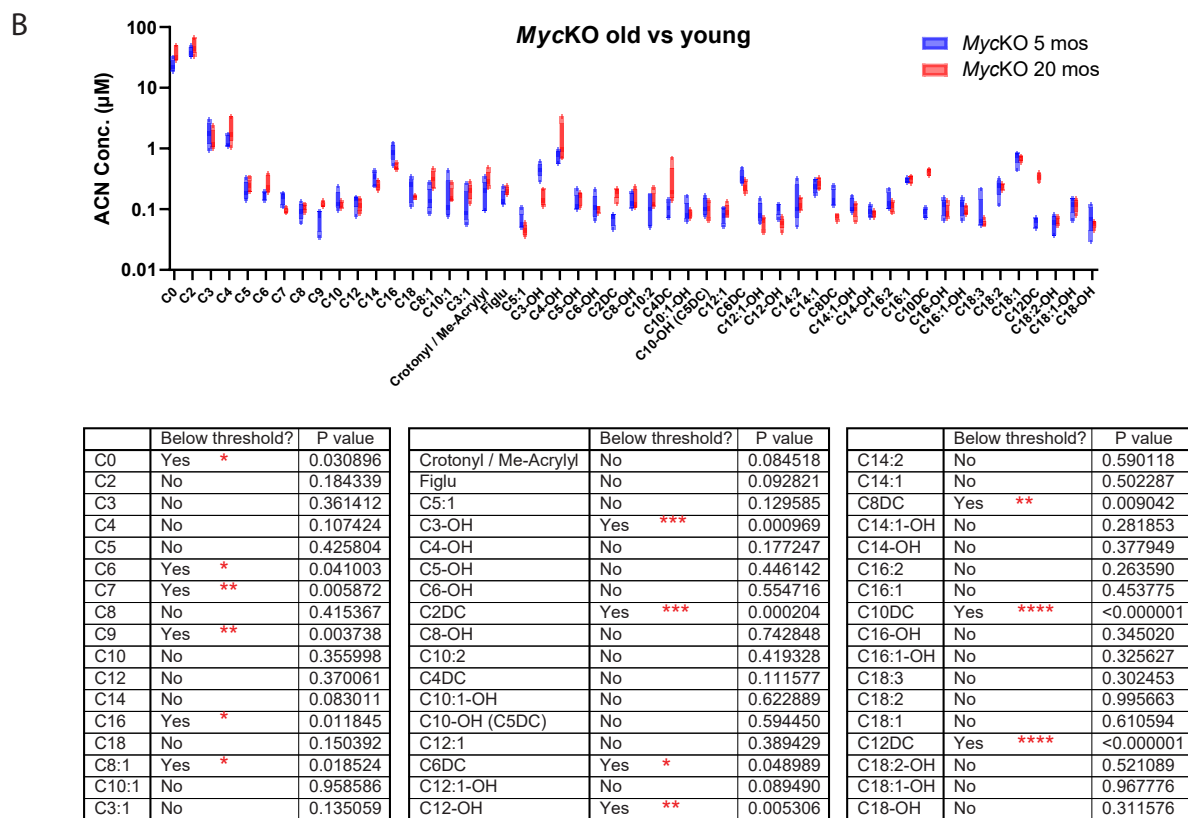

**Figure S5. Both young and old WT and *MycKO* mice show evidence of age-related differences in serum acyl carnitine levels, related to Figure 4F&G**

(A). 5 month old and 20 month-old WT mice. Unpaired t test,  $*=p < 0.05$ ,  $**=p < 0.01$ ,  $***=p < 0.001$ ,  $****=p < 0.0001$ .

(B). 5 month old and 20 month-old *MycKO* mice. Unpaired t test,  $*=p < 0.05$ ,  $**=p < 0.01$ ,  $***=p < 0.001$ ,  $****=p < 0.0001$ .

Fig. S6

A

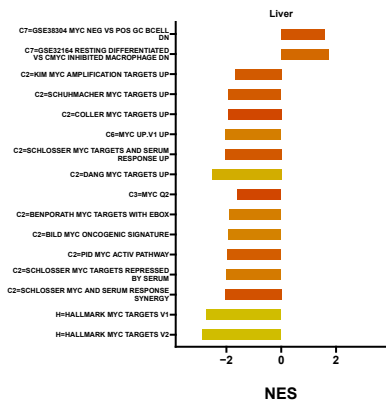

B

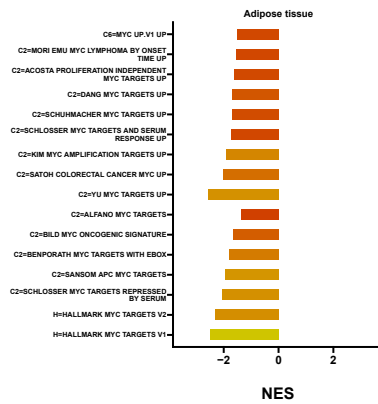

C

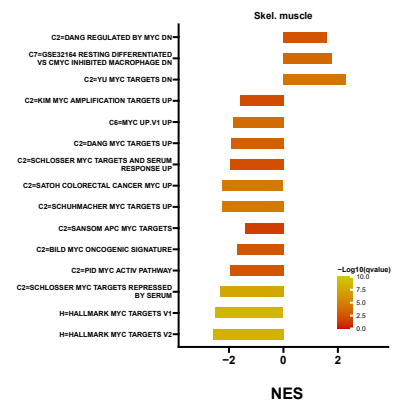

D

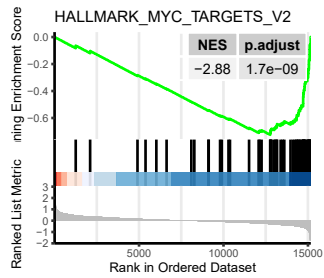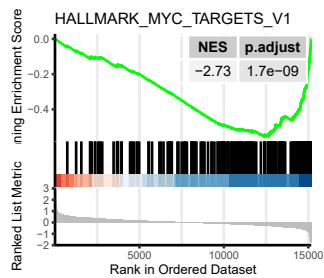

E

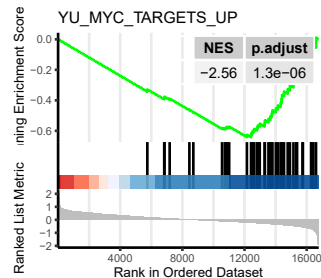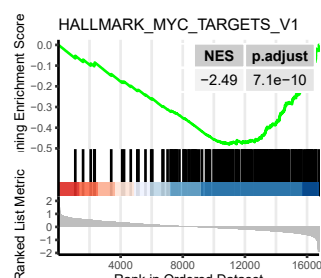

F

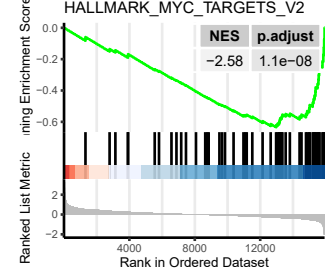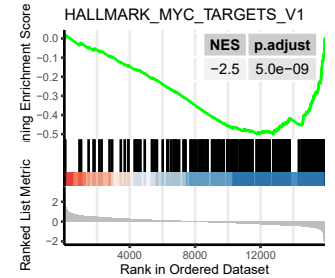

**Figure S6. Dysregulation of Myc target gene sets in 5 mo MycKO tissues, related to Figure 1&6.**

(A-C). GSEA summaries of positively-regulated direct Myc targets in liver, adipose tissue, and skeletal muscle, respectively from 5 month-old MycKO mice. All Myc targets from the MSigDB Collection (<http://www.gsea-msigdb.org/gsea/msigdb/collections.jsp>) were analyzed by GSEA to determine the overall directionality of expression of each set's component transcripts.

(D-F). Select examples of individual GSEA profiles from A-C.

Fig. S7

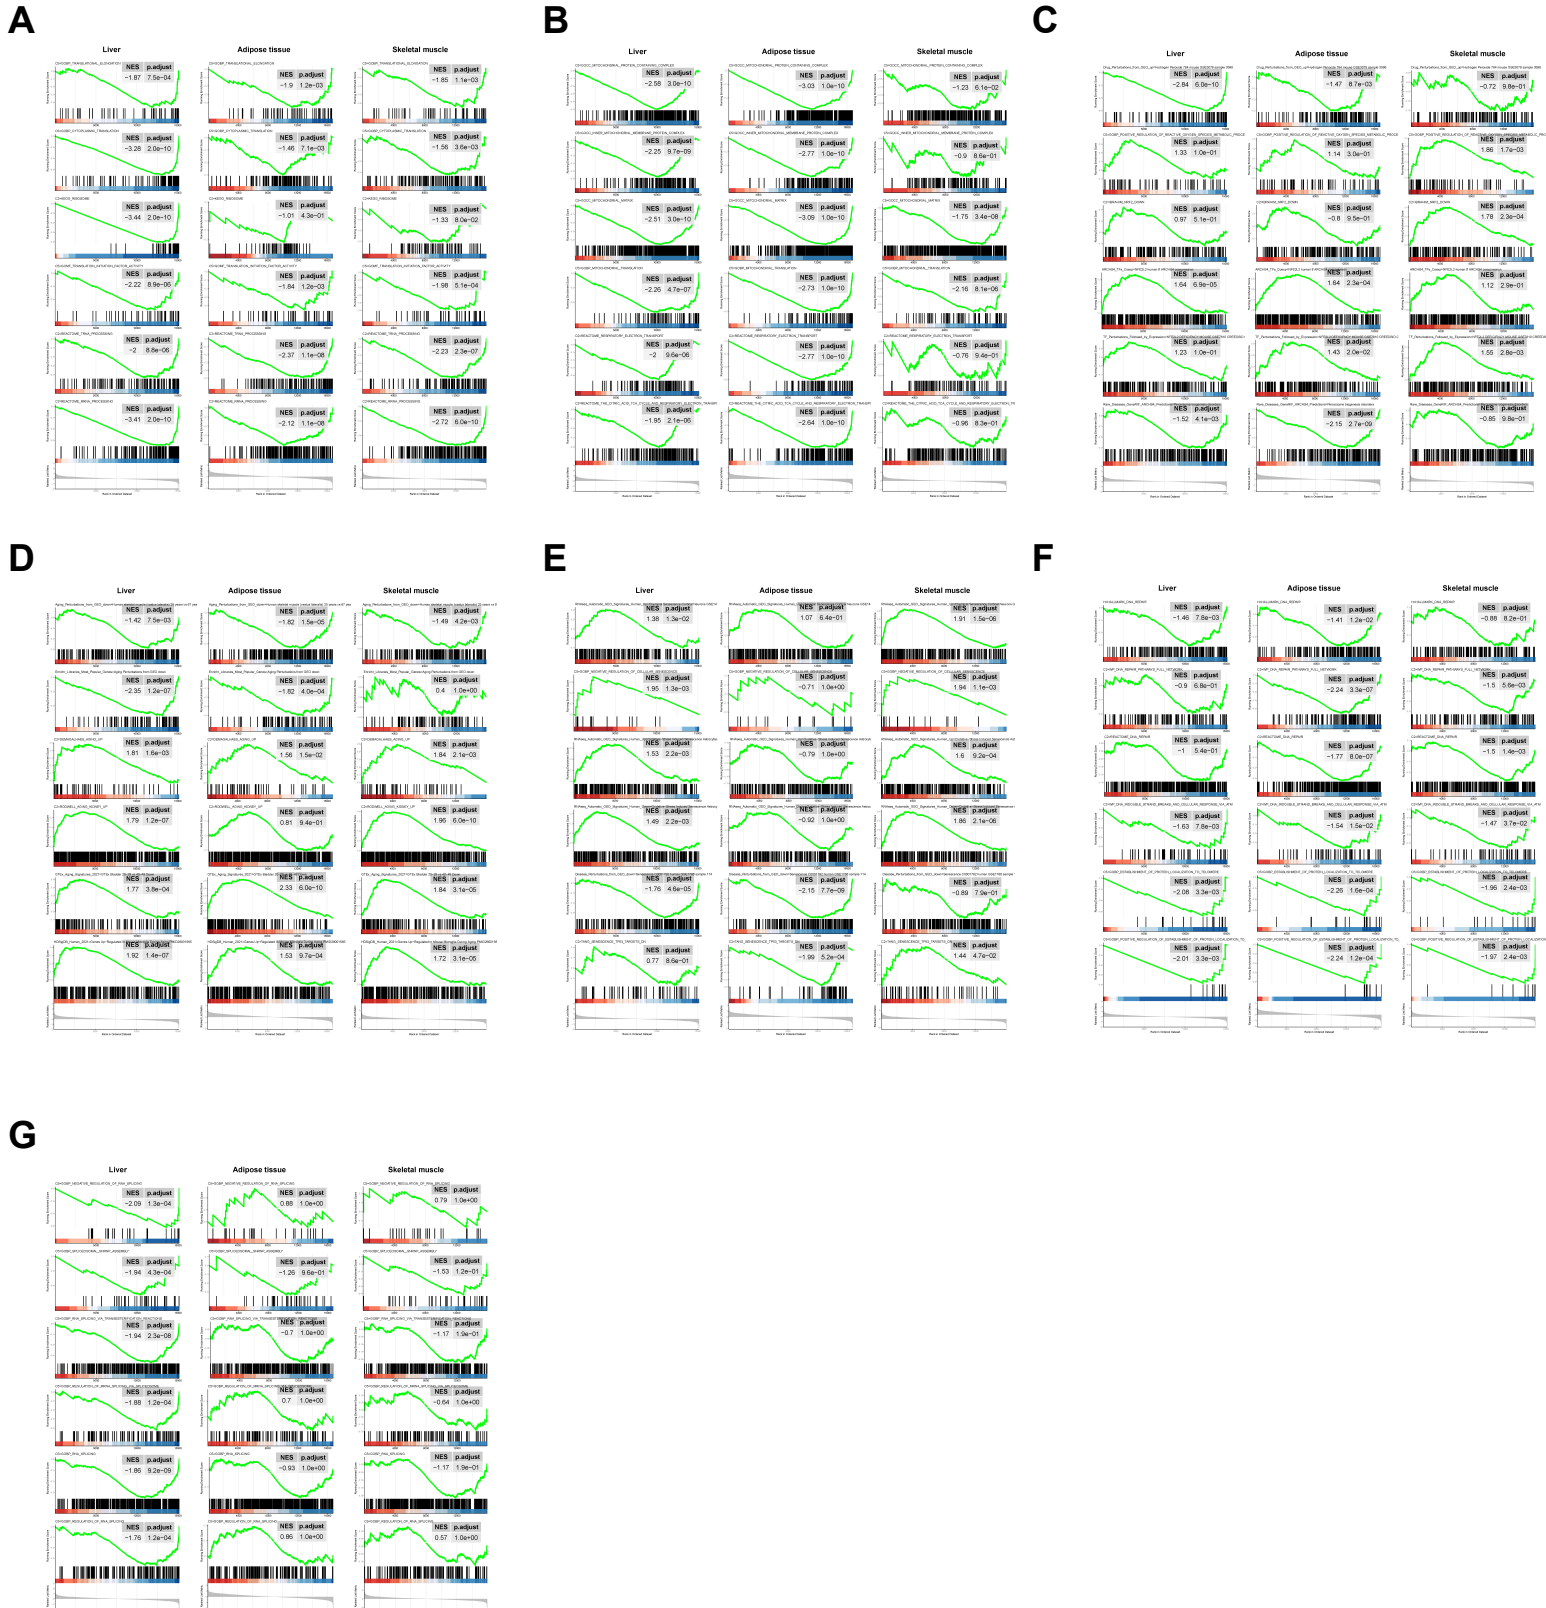

**Figure S7. GSEA profiles in liver, adipose tissue and skeletal muscle from 5 month-old WT and MycKO mice, related to Figure 6A.** Normalized enrichment scores and q values are indicated in the upper right corner of each profile. Data used to generate the ridge plots shown in Figure 6A are re-graphed and included here.

(A) GSEA profiles for “Translation/ribosomal structure and function”.

(B) GSEA profiles for “Mitochondrial structure and function”.

(C) GSEA profiles for “Oxidative stress response”.

(D) GSEA profiles for “Aging”.

(E) GSEA profiles for “Senescence”.

(F) GSEA profiles for “DNA damage response and repair”.

(G) GSEA profiles for “mRNA splicing”.

Fig. S8

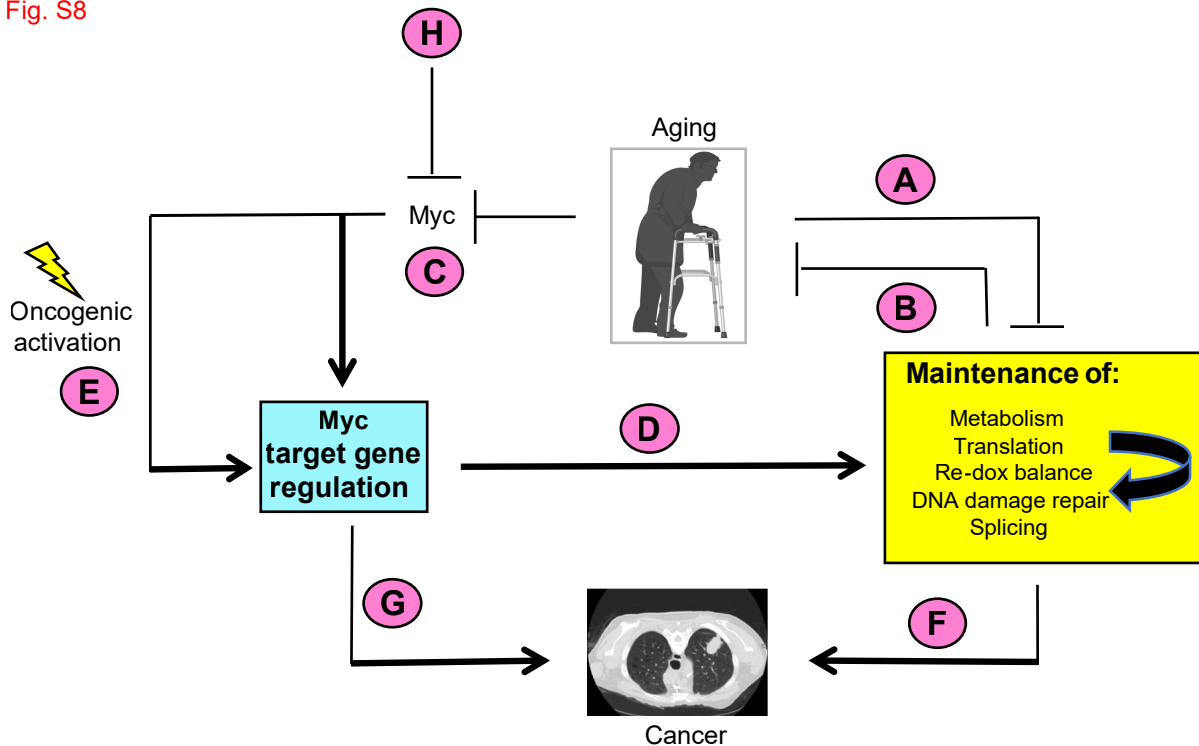



**Figure S8. Model depicting the cooperation between normal aging and Myc regulation, related to Figures 1-7 .**

(A). Normal aging and senescence are associated with the accumulation of Myc-independent defects involving the maintenance of mitochondrial and ribosomal structure and function, redox balance, DNA damage recognition and repair and splicing (yellow box) (Figure 7A).<sup>4-17</sup> Individual functional defects therein can negatively impact other functions (yellow box: curved arrow). For example, defective mitochondrial function can generate ROS, which in turn can cause oxidative DNA damage and impair translation.<sup>18-22</sup>

(B). Defects in the above functions and pathways conversely accelerate aging.<sup>5,9,11,13,23-26</sup>

(C). Normal aging is also associated with declines in Myc levels, causing dysregulation of Myc target gene expression (blue box) (Figure 7F-I).

(D). Normal levels of Myc and its target genes are needed to maintain the baseline cellular functions depicted in the yellow box.<sup>2,27,28</sup> These cooperate with the age-dependent and Myc-independent pathways shown in A.

(E). Oncogenic activation of Myc can dysregulate Myc target genes, thus altering the functions depicted in the yellow box in ways that sustain maximal rates of tumor growth.<sup>2,27-30</sup>

(F). Dysregulation of the functions described for E and D support the initiation, maintenance and/or evolution of cancer.<sup>27-30</sup>

(G). Other Myc target genes not shown in the yellow box, such as those pertaining to cell cycle and survival, can independently contribute to the development of cancer when they are dysregulated as a result of Myc over-expression.<sup>29,31-33</sup> Some of these genes may be so-called “pathological targets” that contain low-affinity Myc binding sites and are only activated in response to the excessive levels of Myc associated with certain tumors.<sup>29,34</sup>

(H). *Myc*KO mice no longer regulate their target genes. As a result, they lose the ability to maintain the functions depicted in the yellow box, thereby hastening the onset of aging via the Myc-dependent pathway that support these functions (B, C and D). Reductions in Myc also eliminate a major age-dependent oncogenic pathway (E), thus leading to a reduced lifetime incidence of cancer (F and G) that contributes to the increased longevity of these mice.

**Table S3. Antibodies used for the current studies, related to STAR Methods.**

| <b>Name of antigen target</b> | <b>Type of antibody</b> | <b>Vendor</b>  | <b>Catalog number</b> | <b>dilution</b>    | <b>Purpose</b>   |
|-------------------------------|-------------------------|----------------|-----------------------|--------------------|------------------|
| <b>Glut 1</b>                 | Rabbit mAb              | Abcam          | Ab115730              | 1:2,000            | WB               |
| <b>Glut 2</b>                 | Rabbit pAb*             | Proteintech    | 20436-1-AP            | 1:1,000            | WB               |
| <b>Glut 4</b>                 | Mouse mAb               | Cell signaling | 2213                  | 1:1,000            | WB               |
| <b>GAPDH</b>                  | Mouse mAb               | Sigma          | G8795                 | 1:10,000           | WB               |
| <b>γH2A.X</b>                 | Rabbit mAb              | Abcam          | ab81299               | 1:200              | IHF              |
| <b>PDH</b>                    | Rabbit mAb              | Cell signaling | 3205                  | 1:1,000            | WB               |
| <b>c-Myc</b>                  | Rabbit mAb              | Cell signaling | 13987                 | 1:1,000<br>1:400   | WB               |
| <b>c-Myc(N-262)</b>           | Rabbit pAb              | Santa Cruze    | sc-764                | 1:250              | IHC              |
| <b>p-PDH</b>                  | Rabbit pAb              | Cal biochem    | AP1062                | 1:300              | WB               |
| <b>PFK-L</b>                  | Rabbit pAb              | Avivva sys bio | ARP45774_T100         | 1:400              | WB               |
| <b>PFK-M</b>                  | Mouse mAb               | R+D systems    | MAB7687               | 1:3,000            | WB               |
| <b>IgG</b>                    | HRP-Goat-anti-rabbit    | Cell signaling | 7074                  | 1:5,000<br>1:2,000 | Secondary for WB |
| <b>IgG</b>                    | HRP-Goat-anti-mouse     | Cell signaling | 7076                  | 1:10,000           | Secondary for WB |

\*pAb=Polyclonal antibody

## References

1. Wang, H., Dolezal, J.M., Kulkarni, S., Lu, J., Mandel, J., Jackson, L.E., Alencastro, F., Duncan, A.W., and Prochownik, E.V. (2018). Myc and ChREBP transcription factors cooperatively regulate normal and neoplastic hepatocyte proliferation in mice. *J Biol Chem* 293, 14740-14757. 10.1074/jbc.RA118.004099.
2. Wang, H., Stevens, T., Lu, J., Airik, M., Airik, R., and Prochownik, E.V. (2022). Disruption of Multiple Overlapping Functions Following Stepwise Inactivation of the Extended Myc Network. *Cells* 11. 10.3390/cells11244087.
3. Muncan, V., Sansom, O.J., Tertoolen, L., Pheesse, T.J., Begthel, H., Sancho, E., Cole, A.M., Gregorieff, A., de Alboran, I.M., Clevers, H., and Clarke, A.R. (2006). Rapid loss of intestinal crypts upon conditional deletion of the Wnt/Tcf-4 target gene c-Myc. *Mol Cell Biol* 26, 8418-8426. 10.1128/MCB.00821-06.
4. Anisimova, A.S., Alexandrov, A.I., Makarova, N.E., Gladyshev, V.N., and Dmitriev, S.E. (2018). Protein synthesis and quality control in aging. *Aging (Albany NY)* 10, 4269-4288. 10.18632/aging.101721.
5. Balaban, R.S., Nemoto, S., and Finkel, T. (2005). Mitochondria, oxidants, and aging. *Cell* 120, 483-495. 10.1016/j.cell.2005.02.001.
6. Bhadra, M., Howell, P., Dutta, S., Heintz, C., and Mair, W.B. (2020). Alternative splicing in aging and longevity. *Hum Genet* 139, 357-369. 10.1007/s00439-019-02094-6.
7. Bratic, A., and Larsson, N.G. (2013). The role of mitochondria in aging. *J Clin Invest* 123, 951-957. 10.1172/JCI64125.
8. Deschenes, M., and Chabot, B. (2017). The emerging role of alternative splicing in senescence and aging. *Aging Cell* 16, 918-933. 10.1111/ace1.12646.
9. Edgar, D., Shabalina, I., Camara, Y., Wredenberg, A., Calvaruso, M.A., Nijtmans, L., Nedergaard, J., Cannon, B., Larsson, N.G., and Trifunovic, A. (2009). Random point mutations with major effects on protein-coding genes are the driving force behind premature aging in mtDNA mutator mice. *Cell Metab* 10, 131-138. 10.1016/j.cmet.2009.06.010.
10. Gonskikh, Y., and Polacek, N. (2017). Alterations of the translation apparatus during aging and stress response. *Mech Ageing Dev* 168, 30-36. 10.1016/j.mad.2017.04.003.
11. Jang, J.Y., Blum, A., Liu, J., and Finkel, T. (2018). The role of mitochondria in aging. *J Clin Invest* 128, 3662-3670. 10.1172/JCI120842.
12. Meshorer, E., and Soreq, H. (2002). Pre-mRNA splicing modulations in senescence. *Aging Cell* 1, 10-16. 10.1046/j.1474-9728.2002.00005.x.
13. Opresko, P.L., and Shay, J.W. (2017). Telomere-associated aging disorders. *Ageing Res Rev* 33, 52-66. 10.1016/j.arr.2016.05.009.
14. Park, Y., and Gerson, S.L. (2005). DNA repair defects in stem cell function and aging. *Annu Rev Med* 56, 495-508. 10.1146/annurev.med.56.082103.104546.
15. Short, K.R., Bigelow, M.L., Kahl, J., Singh, R., Coenen-Schimke, J., Raghavakaimal, S., and Nair, K.S. (2005). Decline in skeletal muscle mitochondrial function with aging in humans. *Proc Natl Acad Sci U S A* 102, 5618-5623. 10.1073/pnas.0501559102.
16. Srivastava, S. (2017). The Mitochondrial Basis of Aging and Age-Related Disorders. *Genes (Basel)* 8. 10.3390/genes8120398.
17. Turi, Z., Lacey, M., Mistrik, M., and Moudry, P. (2019). Impaired ribosome biogenesis: mechanisms and relevance to cancer and aging. *Aging (Albany NY)* 11, 2512-2540. 10.18632/aging.101922.
18. Ghosh, A., and Shcherbik, N. (2020). Effects of Oxidative Stress on Protein Translation: Implications for Cardiovascular Diseases. *Int J Mol Sci* 21. 10.3390/ijms21082661.

19. Kirkinezos, I.G., and Moraes, C.T. (2001). Reactive oxygen species and mitochondrial diseases. *Semin Cell Dev Biol* *12*, 449-457. 10.1006/scdb.2001.0282.
20. Molenaars, M., Janssens, G.E., Williams, E.G., Jongejan, A., Lan, J., Rabot, S., Joly, F., Moerland, P.D., Schomakers, B.V., Lezzerini, M., et al. (2020). A Conserved Mito-Cytosolic Translational Balance Links Two Longevity Pathways. *Cell Metab* *31*, 549-563 e547. 10.1016/j.cmet.2020.01.011.
21. Rosca, M.G., Vazquez, E.J., Chen, Q., Kerner, J., Kern, T.S., and Hoppel, C.L. (2012). Oxidation of fatty acids is the source of increased mitochondrial reactive oxygen species production in kidney cortical tubules in early diabetes. *Diabetes* *61*, 2074-2083. 10.2337/db11-1437.
22. Vafa, O., Wade, M., Kern, S., Beeche, M., Pandita, T.K., Hampton, G.M., and Wahl, G.M. (2002). c-Myc can induce DNA damage, increase reactive oxygen species, and mitigate p53 function: a mechanism for oncogene-induced genetic instability. *Mol Cell* *9*, 1031-1044. 10.1016/s1097-2765(02)00520-8.
23. Kauppila, T.E.S., Kauppila, J.H.K., and Larsson, N.G. (2017). Mammalian Mitochondria and Aging: An Update. *Cell Metab* *25*, 57-71. 10.1016/j.cmet.2016.09.017.
24. Lenaz, G., Bovina, C., Castelluccio, C., Fato, R., Formiggini, G., Genova, M.L., Marchetti, M., Pich, M.M., Pallotti, F., Parenti Castelli, G., and Biagini, G. (1997). Mitochondrial complex I defects in aging. *Mol Cell Biochem* *174*, 329-333.
25. Stefanatos, R., and Sanz, A. (2011). Mitochondrial complex I: a central regulator of the aging process. *Cell Cycle* *10*, 1528-1532. 10.4161/cc.10.10.15496.
26. Trifunovic, A., and Larsson, N.G. (2008). Mitochondrial dysfunction as a cause of ageing. *J Intern Med* *263*, 167-178. 10.1111/j.1365-2796.2007.01905.x.
27. Dang, C.V., O'Donnell, K.A., Zeller, K.I., Nguyen, T., Osthus, R.C., and Li, F. (2006). The c-Myc target gene network. *Semin Cancer Biol* *16*, 253-264. 10.1016/j.semcancer.2006.07.014.
28. Dolezal, J.M., Wang, H., Kulkarni, S., Jackson, L., Lu, J., Ranganathan, S., Goetzman, E.S., Bharathi, S.S., Beezhold, K., Byersdorfer, C.A., and Prochownik, E.V. (2017). Sequential adaptive changes in a c-Myc-driven model of hepatocellular carcinoma. *J Biol Chem* *292*, 10068-10086. 10.1074/jbc.M117.782052.
29. Prochownik, E.V. (2022). Regulation of Normal and Neoplastic Proliferation and Metabolism by the Extended Myc Network. *Cells* *11*. 10.3390/cells11243974.
30. Shachaf, C.M., Kopelman, A.M., Arvanitis, C., Karlsson, A., Beer, S., Mandl, S., Bachmann, M.H., Borowsky, A.D., Ruebner, B., Cardiff, R.D., et al. (2004). MYC inactivation uncovers pluripotent differentiation and tumour dormancy in hepatocellular cancer. *Nature* *431*, 1112-1117. 10.1038/nature03043.
31. Dang, C.V. (2011). Therapeutic targeting of Myc-reprogrammed cancer cell metabolism. *Cold Spring Harb Symp Quant Biol* *76*, 369-374. 10.1101/sqb.2011.76.011296.
32. Dang, C.V. (2012). MYC on the path to cancer. *Cell* *149*, 22-35. 10.1016/j.cell.2012.03.003.
33. Gabay, M., Li, Y., and Felsher, D.W. (2014). MYC activation is a hallmark of cancer initiation and maintenance. *Cold Spring Harb Perspect Med* *4*. 10.1101/cshperspect.a014241.
34. Prochownik, E.V., and Wang, H. (2022). Normal and Neoplastic Growth Suppression by the Extended Myc Network. *Cells* *11*. 10.3390/cells11040747.
